# Supplementary material
Source: Springer Nature journal article supplement (https://www.springermedizin.de/resource/supplementary/13741_2012_7_MOESM3_ESM.pdf/9681992)
Supplement: MOESM3 [file 9681992]

|                                     |               |
|-------------------------------------|---------------|
| <b>MEDLINE</b>                      | <b>(n=47)</b> |
| <b>CINAHL</b>                       | <b>(n=18)</b> |
| <b>EMBASE</b>                       | <b>(n=96)</b> |
| <b>Cochrane library</b>             | <b>(n=51)</b> |
| <b>JBI library</b>                  | <b>(n=3)</b>  |
| <b>SIGLE</b>                        | <b>(n=0)</b>  |
| <b>http://controlled-trials.com</b> | <b>(n=24)</b> |

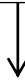

**Potentially relevant articles identified**  
**(n= 239)**

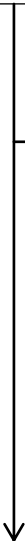

**Clearly not meeting the inclusion criteria after screening for all titles and abstracts (n= 229):**

- |                                               |           |
|-----------------------------------------------|-----------|
| <b>1) did not receive protocol-directed</b>   | <b>67</b> |
| <b>2) irrelevant comparison group</b>         | <b>21</b> |
| <b>3) multiple publication from one study</b> | <b>64</b> |
| <b>4) Population mixed</b>                    | <b>28</b> |
| <b>5) paediatric population</b>               | <b>26</b> |
| <b>6) Involved in DKA care</b>                | <b>9</b>  |
| <b>7) missing data</b>                        | <b>4</b>  |
| <b>8) Target blood glucose higher</b>         | <b>10</b> |

**Hard copies of all potentially relevant articles retrieved:**  
**1) through the above search (n=10) AND**  
**2) sifting through reference lists (n=7)**  
**(total = 17)**

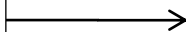

**Irrelevant articles excluded after detailed evaluation of full text. Due to:**

- 1) Population mixed with other medical and surgical patients**
- 2) Irrelevant comparison group, (i.e. computer-based algorithm)**
- 3) Target blood glucose higher than 180mg/dL (10mmol/L)**

**(n= 10)**

Abbreviation: n= number of

**Eligible studies included in systematic review (n= 7)**
